# Supplementary material for: Sn(SCN)2 as an additive for improving the hole transport properties of PEDOT:PSS in organic photovoltaics
Source: Royal Society of Chemistry journal article supplement (doi:10.1039/d3tc02075d), 2023-01-01
Supplement: d3tc02075d1.pdf [file d3tc02075d1.pdf]

## Electronic Supplementary Information

# Sn(SCN)<sub>2</sub> as an Additive for Improving Hole Transport Properties of PEDOT:PSS in Organic Photovoltaics

Jidapa Chaopaknam,<sup>ab</sup> Taweesak Sudyoadsuk,<sup>a</sup> Vinich Promarak,<sup>a</sup> Akinori Saeki,<sup>b</sup> and Pichaya Pattanasattayavong<sup>\*a</sup>

<sup>a</sup> Department of Materials Science and Engineering, School of Molecular Science and Engineering, Vidyasirimedhi Institute of Science and Technology (VISTEC), Rayong 21210, Thailand

<sup>b</sup> Department of Applied Chemistry, Graduate School of Engineering, Osaka University, 2-1 Yamadaoka, Suita, Osaka 565-0871, Japan

\* Corresponding author. Email: [pichaya.p@vistec.ac.th](mailto:pichaya.p@vistec.ac.th)

## Experimental

**Sn(SCN)<sub>2</sub> Solution Preparation.** Tin (II) thiocyanate [Sn(SCN)<sub>2</sub>] was synthesized following the reported procedure.<sup>1</sup> The acquired Sn(SCN)<sub>2</sub> crystals were then ground under 40% RH (relative humidity) to decrease the particle size and improve the dissolution. The Sn(SCN)<sub>2</sub> solution was prepared using 1-propanol (> 99.5%, TCI) at various concentrations of 10, 20, 30 and 40 mg mL<sup>-1</sup>. The solution was stirred for 2 h and filtered by a polytetrafluoroethylene (PTFE) filter with 0.22-μm pore size under inert N<sub>2</sub> atmosphere inside a glove box prior to usage.

**PEDOT:PSS Film Fabrication.** Substrates were cleaned by 1% v/v detergent solution (Liquinox, Alconox Inc.), deionized water, acetone, and isopropanol. For each step, the substrates were placed in an ultrasonication bath for 20 min. Next, the substrates were dried with a N<sub>2</sub> stream and treated with UV-ozone for 15-20 min. To prepare the PEDOT:PSS-Sn(SCN)<sub>2</sub> samples, Sn(SCN)<sub>2</sub> solutions of varying concentrations (from the previous step) were added with a constant volume of 20 μL into 380 μL of the parent PEDOT:PSS solution (Clevios AI 4083, Heraeus), yielding Sn(SCN)<sub>2</sub> concentrations of 0.05, 0.10, 0.15, and 0.20% w/v. The solutions were then blended by stirring for 30 min and filtered by a polyvinylidene fluoride (PVDF) filter with 0.45-μm pore size. The pH of the solutions was measured with a Horiba LAQUAtwin pH meter. The prepared solutions were spin-coated onto the cleaned substrates at 5000 rpm for 30 s, and the films were annealed at 150 °C for 10 min under ambient conditions. For solar cell fabrication, the prepared films were transferred to a glove box.

**Drop-cast Sample Preparation.** To improve the signal intensity for Raman spectroscopy, samples were prepared by drop-casting. The pristine and Sn(SCN)<sub>2</sub>-added PEDOT:PSS solutions were drop-

cast onto substrates pre-heated to 120 °C and left for 10 min to completely evaporate the solvent. This process was carried out under ambient environment.

**Raman Spectroscopy.** Drop-cast samples were analyzed using a Bruker Senterra dispersive Raman microscope. The measurements were performed with a 532-nm laser excitation operated at 2 mW. All Raman spectra were obtained by a 10x objective lens and 20-s acquisition time. Data analysis was conducted using OPUS software.

**X-ray Photoelectron Spectroscopy (XPS).** The chemical analysis of thin films was carried out by using a Jeol JPS9010MC photoelectron spectrometer equipped with a monochromator. The X-ray source was Al K $\alpha$  operated at a 24-kV bias. XPS spectra were recorded with a pass energy of 50 eV for survey scans and 10 eV for core-level scans under a base pressure of 10<sup>-7</sup> Pa. Charge neutralization was required for the measurements by using an electron flood gun with an acceleration voltage of 2 V and an emission current of 5 mA. The data was averaged from 75 scans and analyzed by SpecSurf software. Binding energies of the samples were aligned to the adventitious carbon position (C 1s at 284.8 eV).

**UV-Visible-Near Infrared Spectroscopy (UV-Vis-NIR).** Thin-film samples were deposited on quartz substrates following the procedure described above. Optical transmission and reflection spectra were measured in a wavelength range of 200 – 2000 nm using a PerkinElmer LAMBDA 1050 spectrophotometer equipped with an integrating sphere. The absorption spectra were calculated using the Beer-Lambert law, and the optical band gap values were determined using Tauc plots.

**Photoelectron Yield Spectroscopy (PYS).** The ionization potentials were characterized using a BUNKOUKEIKI BIP-KV216K instrument. All samples were prepared on indium tin oxide (ITO) substrates by spin-coating following the abovementioned procedure. The photoelectron yield was recorded as a function of the excitation energy which was generated by a deuterium lamp (30 W) with an energy range of 4.0 – 9.5 eV. All measurement was operated under vacuum condition at 5×10<sup>-3</sup> Pa. The ionization potentials which are related to the valence band maxima (VBM) or the highest occupied molecular orbital (HOMO) energy levels were determined from the threshold energies of the yield<sup>1/2</sup> spectra.

**Kelvin Probe (KP) Measurements.** Work functions or Fermi energy levels ( $E_F$ ) of film samples deposited on ITO substrates were measured using a KP Technology KP020 system. The data were calculated from the contact potential difference between the analyzed films and an Au reference of a known work function, obtained separately from a PYS measurement. All measurements were performed under ambient condition.

**X-ray Diffraction (XRD).** The structural analysis was performed using a Bruker D8 Advance diffractometer in powder mode (PXRD). The measurements were operated using a Cu K $\alpha$  X-ray source ( $\lambda = 1.5406 \text{ \AA}$ ). The diffraction patterns were recorded over a  $2\theta$  range between 2° and 40° with a measurement step of 0.05°.

**Time-Resolved Microwave Conductivity (TRMC).** Pristine and Sn(SCN)<sub>2</sub>-treated PEDOT:PSS films were prepared on quartz substrates with dimensions of 24×11 mm<sup>2</sup> by spin-coating. The measurement

area of  $11 \times 11 \text{ mm}^2$  was defined by an adhesive tape. The TRMC setup was a custom-made system at Osaka University. The samples were packed in a sealed chamber under  $\text{N}_2$  atmosphere and set in a resonance cavity. Charge carriers were generated by the second harmonic generation (SHG,  $\lambda = 532 \text{ nm}$ ), seeded by a Spectra-Physics Quanta-Ray Nd:YAG laser (ca. 9-ns pulse duration, 10 Hz), and probed by a continuous microwave with a frequency of 9.1 GHz. Specifically, a 5-mm spot of excitation source was fixed at 2 mW, achieving an incident photon density  $I_0 = 1.36 \times 10^{15} \text{ photons cm}^{-2} \text{ pulse}^{-1}$ . The transient photoconductivity ( $\Delta\sigma_{\text{TRMC}}$ ) was converted to the TRMC figure-of-merit, i.e., the product of the charge carrier generation quantum efficiency at the pulse end ( $\phi$ ) and the sum of charge carrier mobilities ( $\Sigma\mu = \mu_h + \mu_e$ ), based on the following<sup>4</sup>

$$\phi\Sigma\mu = [\Delta\sigma_{\text{TRMC}} / (qI_0 F_{\text{light}})] \quad (\text{S1})$$

where  $q$  and  $F_{\text{light}}$  are the elementary charge and a correction (or filling) factor, respectively.

**Four-Point Probe Measurements.** The sheet resistance of samples was measured using a Jandel RM3000+ four-point probe. All samples were spin-coated on glass substrates. The data were recorded with an applied current of 10 nA. The resistivity ( $\rho$ ) values of the film samples were calculated following<sup>2</sup>

$$\rho = \frac{RA}{L} \quad (\text{S2})$$

in which  $R$  = electrical resistance,  $A$  = area, and  $L$  = length. Subsequently, the conductivity ( $\sigma$ ) was calculated from the inverse of  $\rho$ .

**Atomic Force Microscope (AFM).** Thin-film morphology was studied using a Park System NX10 atomic force microscope with non-contact mode. The measurements were operated using Olympus OMCL-AC160TS cantilevers (n-Si, 7-nm tip radius, 300-kHz resonance frequency, 26-N  $\text{m}^{-1}$  spring constant). Root-mean-square roughness values ( $\sigma_{\text{rms}}$ ) of the samples were obtained from  $20 \times 20 \text{ }\mu\text{m}^2$  images. All AFM images were processed in Gwyddion software.<sup>3</sup>

**Profilometry.** Film thicknesses were measured by a Bruker Dektak XT profilometer. For each sample, several scans were recorded, and the reported thickness is the average value.

**Solar Cell Device Fabrication.** Solar cells were fabricated on ITO-coated glass substrates (sheet resistance  $\leq 20 \text{ }\Omega \text{ sq}^{-1}$ , Instrument Glasses). The hole transport layers (HTLs) were pristine PEDOT:PSS or Sn(SCN)<sub>2</sub>-treated PEDOT:PSS films prepared by spin-coating using the procedure described above. The bulk-heterojunction (BHJ) layer was prepared by first dissolving PTB7-Th (PCE10, Ossila) in chlorobenzene (anhydrous, 99.8%, Sigma-Aldrich) at a concentration of 8.8 mg  $\text{mL}^{-1}$  and stirring for 2 h. Next, the solution was filtered with a 0.22- $\mu\text{m}$  PTFE filter, and 900  $\mu\text{L}$  of the PTB7-Th solution was then pipetted to dissolve 13.2 mg of PC<sub>71</sub>BM (> 99%, Ossila), resulting in a blend solution in chlorobenzene. The BHJ solution was stirred at 75 °C for 8 h, and then 30  $\mu\text{L}$  (3% v/v) of 1,8 diiodooctane (98%, TCI) was added. Subsequently, the active layer was spin-coated on the HTL at 1750 rpm for 30 s and treated with methanol (anhydrous, 99.8%, Sigma-Aldrich) as an antisolvent at 4000 rpm for 30 s. All fabrication processes of solar cells were done under inert atmosphere inside a glove box. The films were stored in a high-vacuum chamber ( $< 5 \times 10^{-6} \text{ Torr}$ ) overnight prior to the next step. Finally, the solar cells with an active area of  $0.0707 \text{ cm}^2$  were completed by thermally evaporating

10-nm bathocuproine (BCP, >99.0%, TCI) and 100-nm Al top contact through a shadow mask using an ALS Technology E200 physical vapor deposition system.

**Solar Cell Characterization.** Current density-voltage ( $J$ - $V$ ) characteristics of solar cells were measured with a source-measure unit (ADCMT 6241A) and a solar simulator (SAN-EI ELECTRIC XES-301S with AM1.5G filter) calibrated to 1 sun intensity with a photodiode reference device (S1137-1010BQ, Bunkoukeiki). All solar cell devices were enclosed in a sealed chamber to prevent the degradation during the measurement.

**External Quantum Efficiency (EQE).** EQE spectra were recorded by a BUNKOUKEIKI SM-250 measurement system. All samples were sealed in the closed chamber during this measurement. The monochromatic light was generated from a xenon lamp, and the spectra were measured in a wavelength range of 300 to 900 nm with a step of 5 nm. The intensity of irradiation at each wavelength was collected and calibrated using a silicon photodiode (S1137-1010BQ, Bunkoukeiki).

**Electrochemical Impedance Spectroscopy (EIS).** The impedance spectra of the solar cells were measured using an impedance gain-phase analyzer (Solartron Analytical 1260A) in the dark under inert atmosphere. The measurements were performed with a 50-mV ac sinusoidal signal and a 0.8-V dc bias potential. The frequency was swept from 1 MHz to 10 Hz. All fitting parameters and errors were analyzed using ZView software. The fitting parameters were  $R_c$  = contact resistance,  $C_{geo}$  = geometric capacitance of the OPV device,  $R_t$  = transport resistance,  $R_{rec}$  = recombination resistance, and a constant phase element (CPE). The equivalent capacitance ( $C_{eq}$ ) of the CPE is given as<sup>5,6</sup>

$$C_{eq} = \frac{\tau_{avg}}{R_{rec}} = \frac{(R_{rec}Q)^{1/n}}{R_{rec}} \quad (S3)$$

where  $\tau_{avg}$  = average relaxation time,  $Q$  = the magnitude of the CPE, and  $n$  = ideality factor.

**Space Charge Limited Current (SCLC) Mobility Measurements.** The overall hole mobilities of the solar cells were calculated by fitting the dark current for hole-only diodes to the SCLC model. Hole-only devices were fabricated by substituting BCP/Al with MoO<sub>3</sub> (10 nm)/Au (100 nm). The fitting model is based on the Murgatroyd expression<sup>7,8</sup>

$$J(V) = \frac{9}{8} \varepsilon_0 \varepsilon_r \mu_0 \exp\left(0.89\beta \sqrt{\frac{V-V_{bi}}{L}}\right) \frac{(V-V_{bi})^2}{L^3} \quad (S4)$$

where  $\varepsilon_0$  = vacuum permittivity,  $\varepsilon_r$  = relative dielectric constant (3.3 for the organic layer),  $\mu_0$  = zero-field mobility,  $\beta$  = field activation factor,  $V_{bi}$  = built-in voltage, and  $L$  = thickness of the active layer.

## References

- (1) Wechwithayakhlung, C.; Packwood, D. M.; Chaopaknam, J.; Worakajit, P.; Ittisanronnachai, S.; Chanlek, N.; Promarak, V.; Kongpatpanich, K.; Harding, D. J.; Pattanasattayavong, P. Tin(II) Thiocyanate Sn(NCS)<sub>2</sub> – a Wide Band Gap Coordination Polymer Semiconductor with a 2D Structure. *J. Mater. Chem. C* **2019**, *7*, 3452–3462.

- (2) Oliveira, F. S.; Cipriano, R. B.; da Silva, F. T.; Romão, E. C.; dos Santos, C. A. M. Simple Analytical Method for Determining Electrical Resistivity and Sheet Resistance Using the van Der Pauw Procedure. *Sci. Rep.* **2020**, *10*, 16379.
- (3) Nečas, D.; Klapetek, P. Gwyddion: An Open-Source Software for SPM Data Analysis. *Cent. Eur. J. Phys.* **2012**, *10*, 181–188.
- (4) Saeki, A.; Koizumi, Y.; Aida, T.; Seki, S. Comprehensive Approach to Intrinsic Charge Carrier Mobility in Conjugated Organic Molecules, Macromolecules, and Supramolecular Architectures. *Acc. Chem. Res.* **2012**, *45*, 1193–1202.
- (5) Leever, B. J.; Bailey, C. A.; Marks, T. J.; Hersam, M. C.; Durstock, M. F. In Situ Characterization of Lifetime and Morphology in Operating Bulk Heterojunction Organic Photovoltaic Devices by Impedance Spectroscopy. *Adv. Energy Mater.* **2012**, *2*, 120–128.
- (6) Guerrero, A.; Ripolles-Sanchis, T.; Boix, P. P.; Garcia-Belmonte, G. Series Resistance in Organic Bulk-Heterojunction Solar Devices: Modulating Carrier Transport with Fullerene Electron Traps. *Org. Electron.* **2012**, *13*, 2326–2332.
- (7) Murgatroyd, P. N. Theory of Space-Charge-Limited Current Enhanced by Frenkel Effect. *J. Phys. D. Appl. Phys.* **1970**, *3*, 308.
- (8) Liang, R.-Z.; Babics, M.; Seitkhan, A.; Wang, K.; Geraghty, P. B.; Lopatin, S.; Cruciani, F.; Firdaus, Y.; Caporuscio, M.; Jones, D. J.; Beaujuge, P. M. Additive-Morphology Interplay and Loss Channels in “All-Small-Molecule” Bulk-Heterojunction (BHJ) Solar Cells with the Nonfullerene Acceptor IDTTBM. *Adv. Funct. Mater.* **2018**, *28*, 1705464.

**Table S1.** Concentration of Sn(SCN)<sub>2</sub> in PEDOT:PSS solution, pH of mixed solution, PEDOT/PSS ratio from XPS S 2p spectra, and measured optical band gap.

| Sn(SCN) <sub>2</sub> starting concentration [mg mL <sup>-1</sup> ] | Sn(SCN) <sub>2</sub> volume [μL] | PEDOT:PSS volume [μL] | Additive concentration [% w/v] | pH of mixed solution | PEDOT/PSS ratio (from XPS S 2p peaks) | Optical band gap [±0.02 eV] |
|--------------------------------------------------------------------|----------------------------------|-----------------------|--------------------------------|----------------------|---------------------------------------|-----------------------------|
| -                                                                  | -                                | 400                   | -                              | 1.90                 | 0.134                                 | 3.12                        |
| 0<br>(Neat 1-propanol)                                             | 20                               | 380                   | -                              | 3.11                 | 0.138                                 | 3.11                        |
| 10                                                                 | 20                               | 380                   | 0.05                           | 3.74                 | 0.141                                 | 3.16                        |
| 20                                                                 | 20                               | 380                   | 0.10                           | 4.29                 | 0.147                                 | 3.17                        |
| 30                                                                 | 20                               | 380                   | 0.15                           | 4.52                 | 0.163                                 | 3.17                        |
| 40                                                                 | 20                               | 380                   | 0.20                           | 4.67                 | 0.182                                 | 3.18                        |

**Table S2.** Solar cell parameters employing PEDOT:PSS HTLs treated with varying concentrations of Sn(SCN)<sub>2</sub>. The device area was 0.0707 cm<sup>2</sup>. For each device parameters, the maximum (Max) or minimum (Min), average (Avg), and standard deviation (SD) values are given in this table.

| HTL material<br>Sn(SCN) <sub>2</sub> added [% w/v] | J <sub>sc</sub> [mA cm <sup>-2</sup> ] |       |      | V <sub>oc</sub> [V] |       |       | FF [%] |      |     | PCE [%] |      |      | R <sub>sh</sub> [Ω cm <sup>2</sup> ] |     |     | R <sub>s</sub> [Ω cm <sup>2</sup> ] |     |     | No. of devices |
|----------------------------------------------------|----------------------------------------|-------|------|---------------------|-------|-------|--------|------|-----|---------|------|------|--------------------------------------|-----|-----|-------------------------------------|-----|-----|----------------|
|                                                    | Max                                    | Avg   | SD   | Max                 | Avg   | SD    | Max    | Avg  | SD  | Max     | Avg  | SD   | Max                                  | Avg | SD  | Min                                 | Avg | SD  |                |
| 0.05                                               | 17.02                                  | 16.11 | 0.47 | 0.816               | 0.808 | 0.005 | 73.6   | 72.1 | 1.7 | 9.36    | 9.29 | 0.04 | 1168                                 | 865 | 159 | 0.6                                 | 1.2 | 0.3 | 10             |
| 0.10                                               | 17.00                                  | 16.40 | 0.41 | 0.817               | 0.810 | 0.004 | 74.4   | 72.3 | 1.5 | 9.51    | 9.41 | 0.05 | 1067                                 | 842 | 128 | 0.6                                 | 0.9 | 0.3 | 10             |
| 0.15                                               | 17.68                                  | 17.06 | 0.42 | 0.818               | 0.809 | 0.006 | 75.0   | 72.9 | 1.4 | 9.90    | 9.77 | 0.07 | 980                                  | 763 | 119 | 0.7                                 | 0.9 | 0.2 | 10             |
| 0.20                                               | 16.78                                  | 16.17 | 0.31 | 0.813               | 0.805 | 0.005 | 74.5   | 73.1 | 1.0 | 9.23    | 9.15 | 0.05 | 951                                  | 816 | 89  | 0.8                                 | 1.5 | 0.6 | 10             |
| Pristine PEDOT:PSS                                 | 16.73                                  | 15.94 | 0.54 | 0.814               | 0.809 | 0.004 | 72.8   | 69.8 | 1.8 | 9.09    | 8.99 | 0.11 | 855                                  | 694 | 77  | 0.6                                 | 0.9 | 0.2 | 10             |

**Table S3.** Fitting parameters of solar cells analyzed from impedance spectroscopy under dark condition at a dc bias of 0.8 V. Numbers in the parentheses denote the fitting errors.

| HTL material                                      | R <sub>c</sub> [Ω] | R <sub>t</sub> [Ω] | C <sub>geo</sub> [nF] | R <sub>rec</sub> [Ω] | Q [nF]      | n           |
|---------------------------------------------------|--------------------|--------------------|-----------------------|----------------------|-------------|-------------|
| Pristine PEDOT:PSS                                | 16.85 (1.3%)       | 67.53 (1.2%)       | 12.0 (1.1%)           | 20.05 (3.9%)         | 30.3 (3.2%) | 0.93 (0.3%) |
| 0.15% w/v Sn(SCN) <sub>2</sub> -treated PEDOT:PSS | 14.51 (1.7%)       | 62.36 (1.5%)       | 13.3 (1.3%)           | 17.38 (4.5%)         | 34.1 (3.6%) | 0.92 (0.3%) |

**Table S4.** Hole mobility ( $\mu_{h,SCLC}$ ) of hole-only devices extracted from the space-charge limited current (SCLC) analysis.

| HTL material                                      | $\mu_{h,SCLC}$<br>[ $\times 10^{-5}$ cm <sup>2</sup> V <sup>-1</sup> s <sup>-1</sup> ] | Fitting error<br>[ $\times 10^{-5}$ cm <sup>2</sup> V <sup>-1</sup> s <sup>-1</sup> ] |
|---------------------------------------------------|----------------------------------------------------------------------------------------|---------------------------------------------------------------------------------------|
| Pristine PEDOT:PSS                                | 3.67                                                                                   | 0.40                                                                                  |
| 0.15 w/v% Sn(SCN) <sub>2</sub> -treated PEDOT:PSS | 4.17                                                                                   | 0.45                                                                                  |

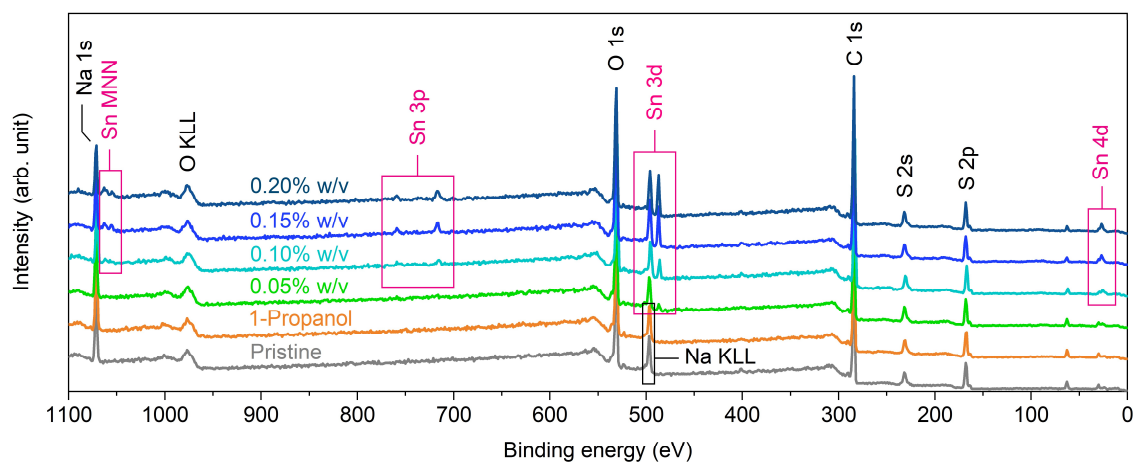

**Figure S1.** XPS survey scans.

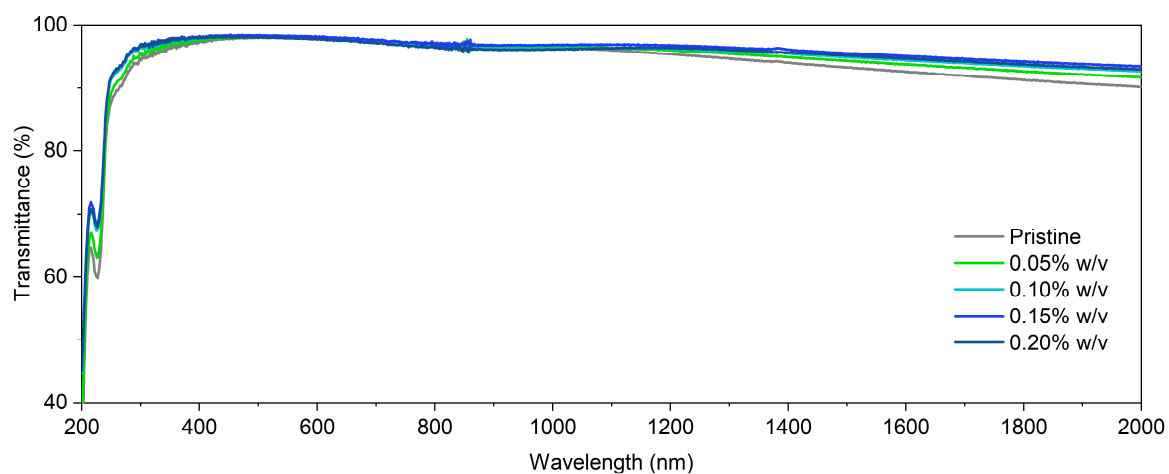

**Figure S2.** Full data range of UV-Vis-NIR transmission spectra.



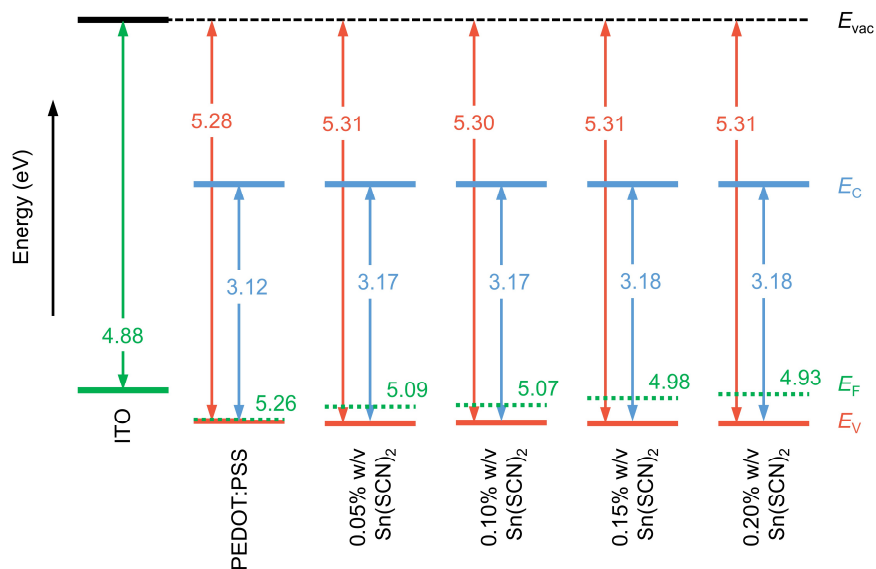

**Figure S3.** Schematic energy diagrams of the PEDOT:PSS layers added with different  $\text{Sn}(\text{SCN})_2$  concentrations, constructed using data from PYS, KP, and UV-Vis-NIR measurements.  $E_{\text{vac}}$  denotes the vacuum level,  $E_c$  the conduction band edge (solid blue lines),  $E_v$  the valence band edge (solid red lines), and  $E_F$  the Fermi level (dotted green lines).

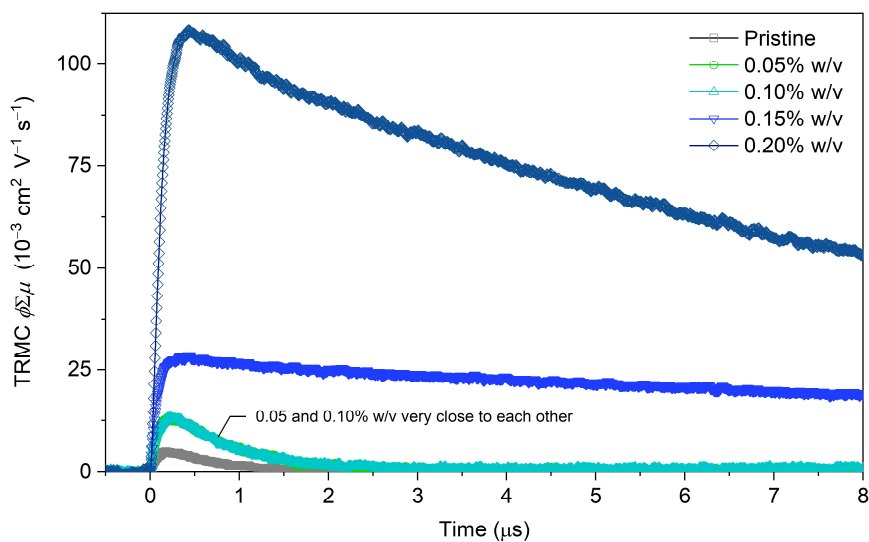

**Figure S4.** The product of charge carrier generation quantum efficiency and the sum of carrier mobilities ( $\phi\Sigma\mu$ ) as a function of time measured by TRMC.

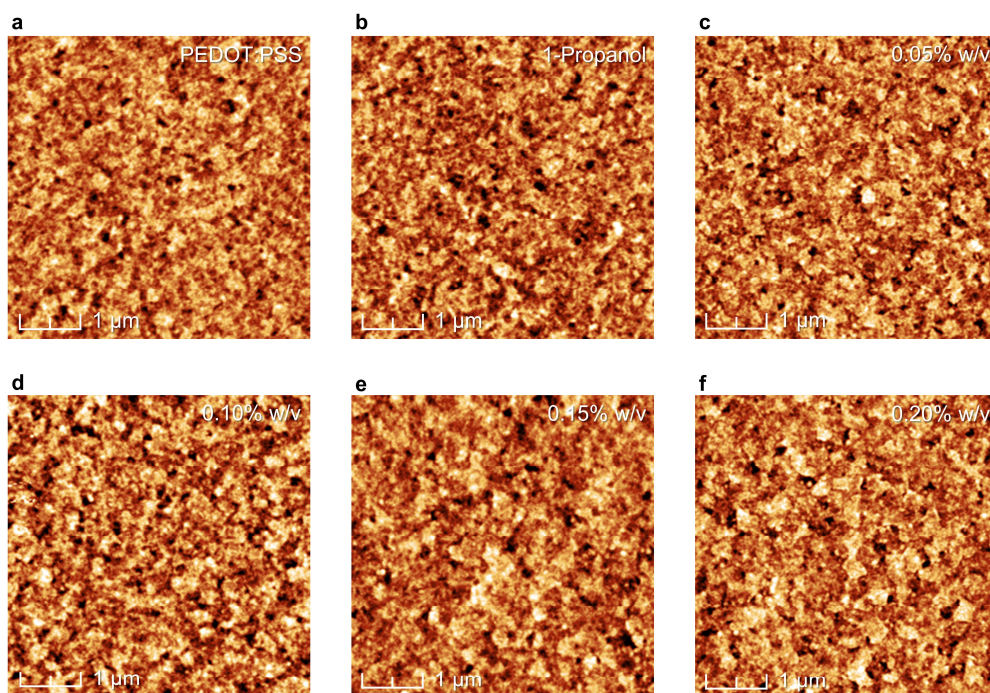

**Figure S5.** AFM topographic images over a  $5 \times 5 \mu\text{m}^2$  area of: (a) pristine PEDOT:PSS, (b) PEDOT:PSS treated with neat 1-propanol, (c-f) PEDOT:PSS treated with 0.05, 0.10, 0.15, and 0.20% w/v of  $\text{Sn}(\text{SCN})_2$ , respectively.

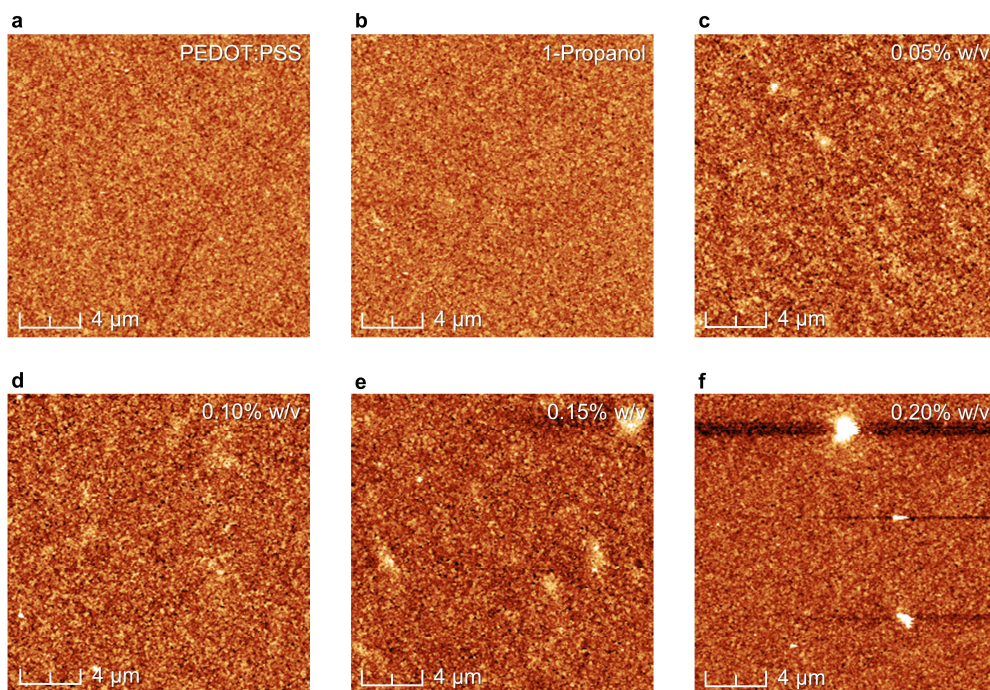

**Figure S6.** AFM topographic images over a  $20 \times 20 \mu\text{m}^2$  area of: (a) pristine PEDOT:PSS, (b) PEDOT:PSS treated with neat 1-propanol, (c-f) PEDOT:PSS treated with 0.05, 0.10, 0.15, and 0.20% w/v of  $\text{Sn}(\text{SCN})_2$ , respectively. The black streaks in (e) and (f) are artefacts due to the large particles.

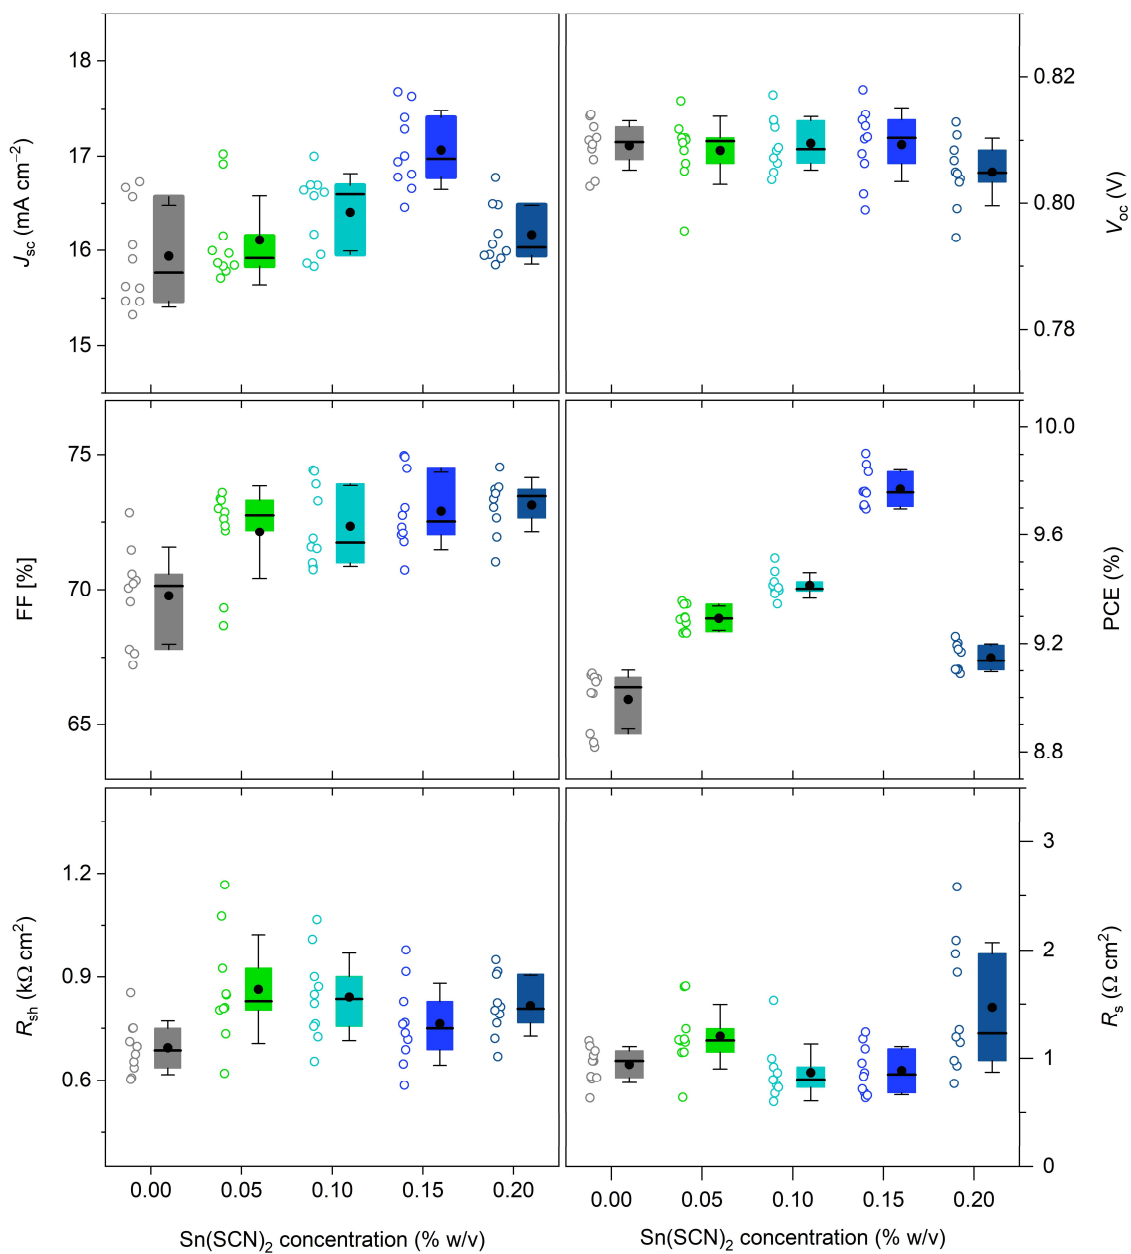

**Figure S7.** Scattered data points and box plots of OPV cell parameters for different concentrations of  $\text{Sn}(\text{SCN})_2$  as an additive in the PEDOT:PSS HTL. The boxes represent the 25<sup>th</sup> – 75<sup>th</sup> percentiles with the horizontal lines indicating the 50<sup>th</sup> percentiles. The black dots indicate the mean values, and the whiskers show the standard deviation.

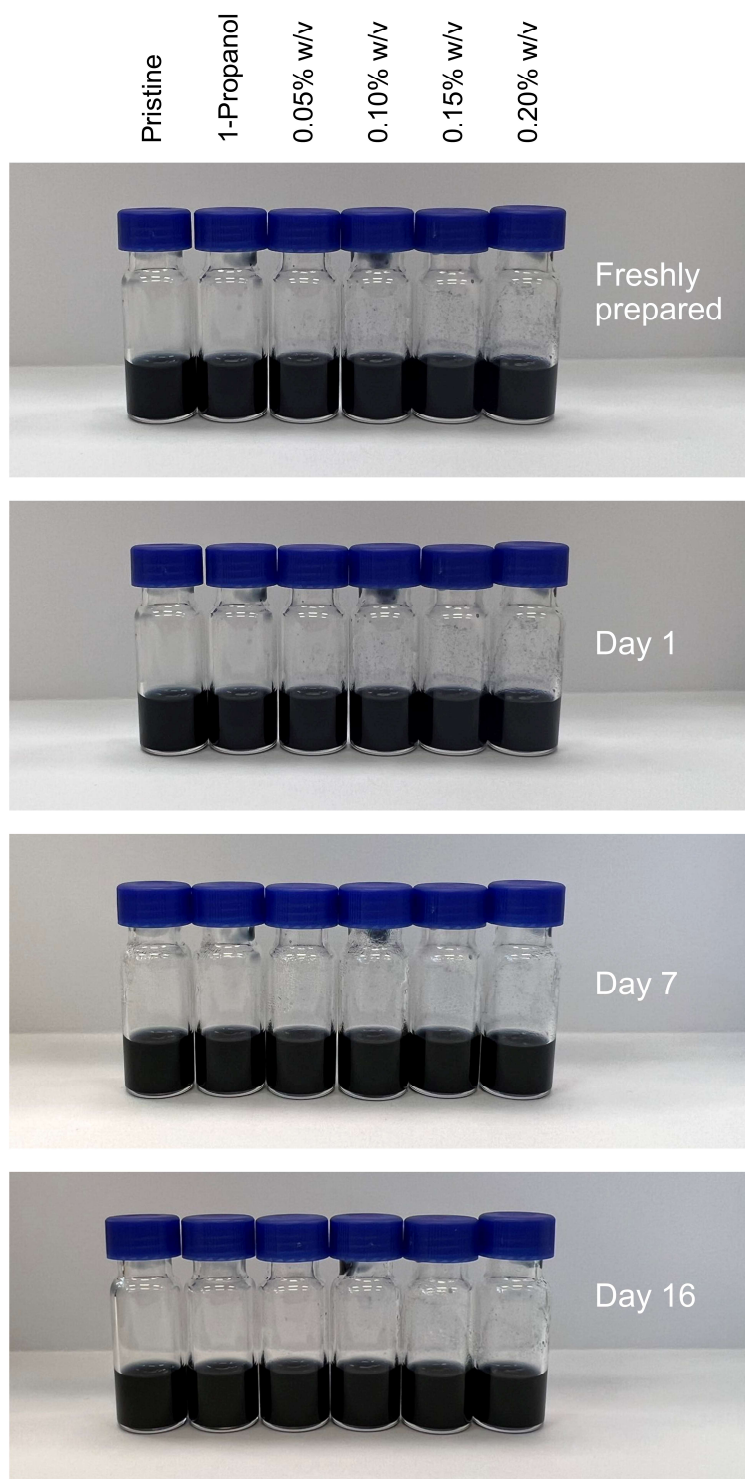

**Figure S8.** Images of the prepared solutions taken at different times.
